# Supplementary material for: Empowering AlphaFold2 for protein conformation selective drug discovery with AlphaFold2-RAVE
Source: eLife. 2024 Sep 6;13:RP99702. doi: 10.7554/eLife.99702 (PMC11379456; doi:10.7554/eLife.99702)
Supplement: Supplementary file 1. — Confidence score for the DiffDock pose aligns with AF2RAVE potential of mean force (PMF) values. The DiffDock confidence score of the pose with the lowest ligand RMSD (marked in red/bold) from each classical DFG-out structure in DDR1 reduced multiple sequence alignment (rMSA) AlphaFold2 (AF2) ensemble is compared with the AF2RAVE PMF value for corresponding structure (marked in red/bold). [file elife-99702-supp1.xlsx]

## Sheet: Sheet1
AF2RAVE pmf (kJ/mol)	Lowest ponatinib ligand RMSD (A)	DiffDock conf_score	Lowest imatinib ligand RMSD (A)	DiffDock conf_score
0.37	0.71	-1.44	0.55	-2.77
0.57	0.7	-1.16	0.43	-2.32
1.13	1.48	-2.84	3.31	-2.94
1.45	0.88	-3.85		-1000
1.62	0.82	-1.61	0.7	-2.42
2.07		-1000		-1000
2.69	0.62	-2.21	0.59	-2.94
3.82	0.86	-2.78	0.83	-4.23
4.02	0.71	-3.1	0.75	-4.29
4.21	0.82	-1.97	0.7	-2.86
4.39	12.77	-5.26	10.52	-5.35
4.7	0.85	-3.31	0.66	-3.9
7.6	1.22	-3.38	0.86	-4.68
N/A	0.75	-1.99	0.49	-3.67
N/A	0.75	-2.66	0.69	-3.79
